# Supplementary material for: Macropinocytosis of Nab-paclitaxel Drives Macrophage Activation in Pancreatic Cancer
Source: Oxford University Press journal article supplement (doi:10.1158/2326-6066.cir-16-0125), 2017-01-20
Supplement: 23266066cir160125-sup-167211_1_supp_3762657_ljxlp5.docx [file 23266066cir160125-sup-167211_1_supp_3762657_ljxlp5.docx]

**Supplementary Figure Legends**

**Supplementary Figure 1. Nab-paclitaxel induces M1 cytokine protein expression *in vitro*.** Western blot analysis of IL1, IL1, IL6 and TNF expression in RAW 264.7 cells treated with vehicle (PBS), LPS or nab-ptx for 8 hours. VINCULIN served as a protein loading control. Numbers below Western blots indicate level of cytokine induction normalized to VINCULIN and relative to vehicle control.

**Supplementary Figure 2. LPS induces M1 cytokine expression in a TLR4-dependent manner.** Relative gene expression levels of *Il1a*, *Il1b*, *Il6, Il12 p40* and *Tnfa* treated with LPS or with LPS and 5 M CLI-095. Bars represent standard error from three independent experiments. *, p < 0.05; **, p < 0.01; ns, not significant.

**Supplementary Figure 3.** **Nab-paclitaxel induces M1 activation in pancreatic tumor-associated macrophages *in vivo***. A) Representative flow cytometry plot of PE-F4/80-positive cells sorted from *KPC* orthotopic tumors two weeks after orthotopic implantation and treated *ex vivo* with serum-free medium (vehicle, grey) or 20 g of OG-nab-ptx (green). Quantification of mean percentage of OG-nab-ptx-positive cells from triplicate samples is shown. Bars depict standard deviation. B) Quantification of total F4/80-positive cells (gated on the CD45-positive population) in *KPC* orthotopic tumors 48 hours post-treatment. Bars depict standard error from four independent experiments. C) Relative gene expression levels of *Il1b* in CD45/F4/80 double-positive cells sorted from *KPC* orthotopic tumors 48 hours post-treatment. *, p < 0.05; **, p < 0.01; ns, not significant.
